# Supplementary material
Source: Springer Nature journal article supplement (https://www.springermedizin.de/resource/supplementary/12936_2007_385_MOESM2_ESM.pdf/9547690)

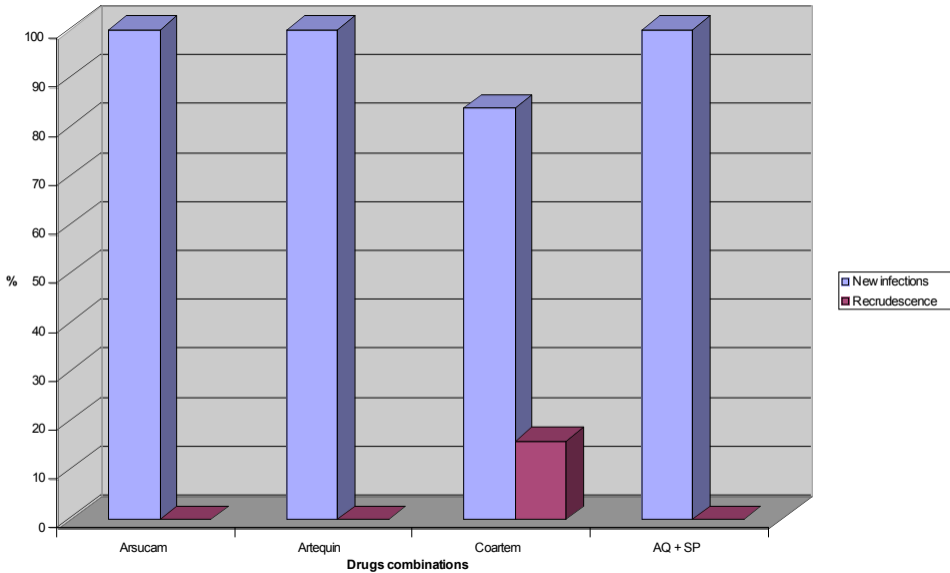

Supplement: MOESM2 [file 9547690]
